# Supplementary material for: The O-GlcNAc Transferase Intellectual Disability Mutation L254F Distorts the TPR Helix
Source: PubMed Central journal article supplement (PMC5967971; doi:10.1016/j.chembiol.2018.03.004), 2018-05-17
Supplement: mmc1.pdf [file mmc1.pdf]

**Cell Chemical Biology, Volume 25**

**Supplemental Information**

**The O-GlcNAc Transferase Intellectual Disability**

**Mutation L254F Distorts the TPR Helix**

**Mehmet Gundogdu, Salomé Llabrés, Andrii Gorelik, Andrew T. Ferenbach, Ulrich Zachariae, and Daan M.F. van Aalten**

**A**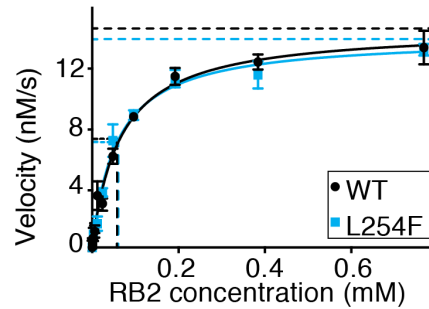**B**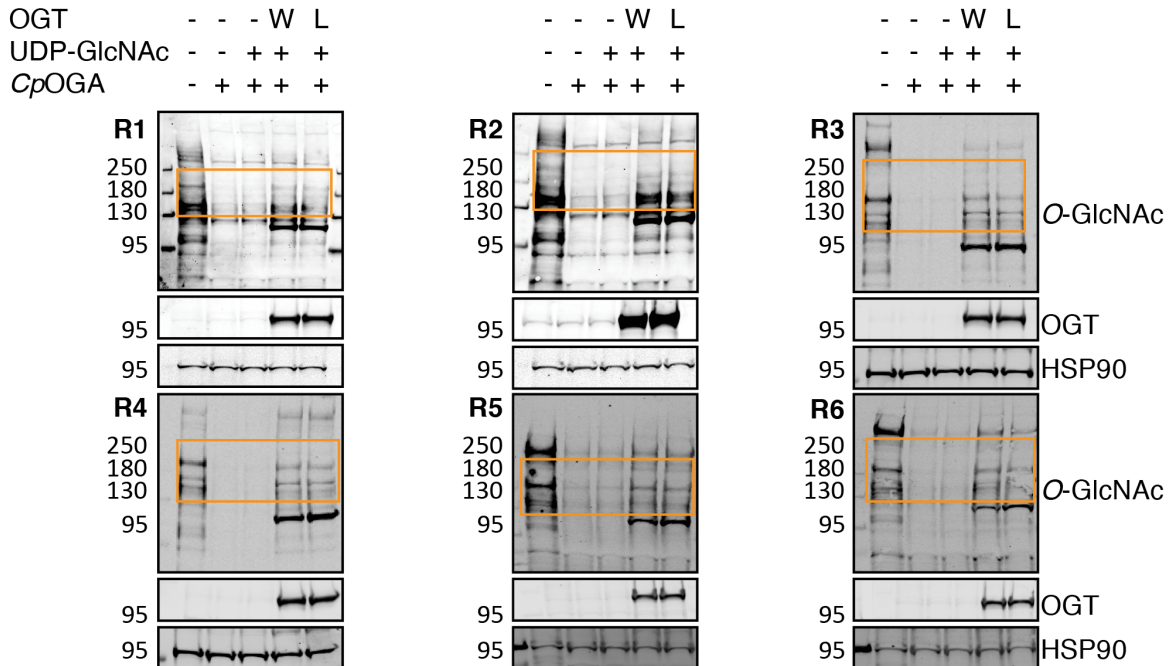

**Supplemental figure 1: *in vitro* characterisation of OGT<sub>L254F</sub>. Related to Figure**

**1B**

**(A)** Michaelis-Menten kinetics of OGT wild type and mutant against RB2 peptide. X- and y-axis intercepts of the dashed lines mark the Michaelis constant ( $K_M$ ) and maximum velocity ( $V_{max}$ ) of the reaction. Error bars represent standard deviation of three replicates. **(B)** Western blot analyses showing OGT activity against de-O-GlcNAcylated HEK-293 cell lysate. Results represent six biological replicates and orange boxes depict the area that was used for quantification. CpOGA: *Clostridium perfringens*; L: L254F; W: wild type.

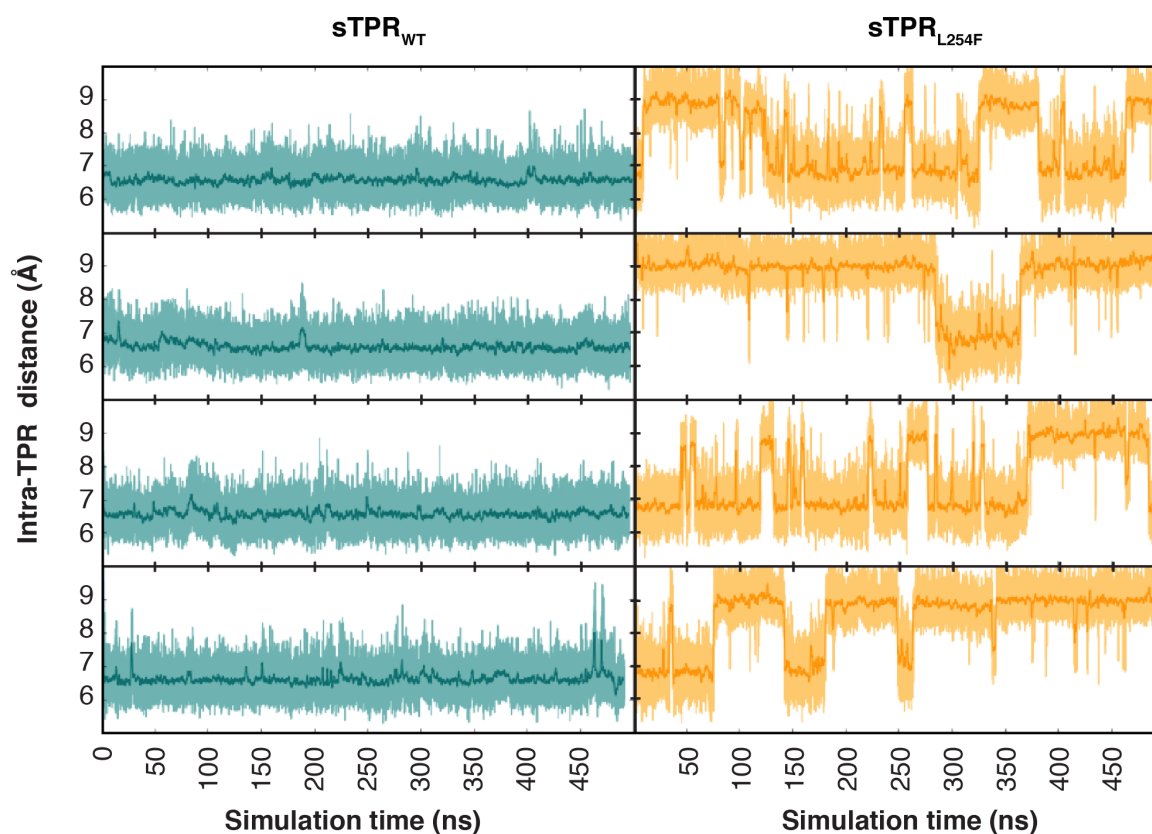

**Supplemental figure 2: Analysis of the intra-TPR repeat distance. Related to Figures 2B and 2C**

Molecular dynamics simulation data investigating the intra TPR distance observed in sTPR<sub>WT</sub> and sTPR<sub>L254F</sub> are shown on left and right panels, respectively. sTPR: simplified TPR; TPR: tetratricopeptide repeat.

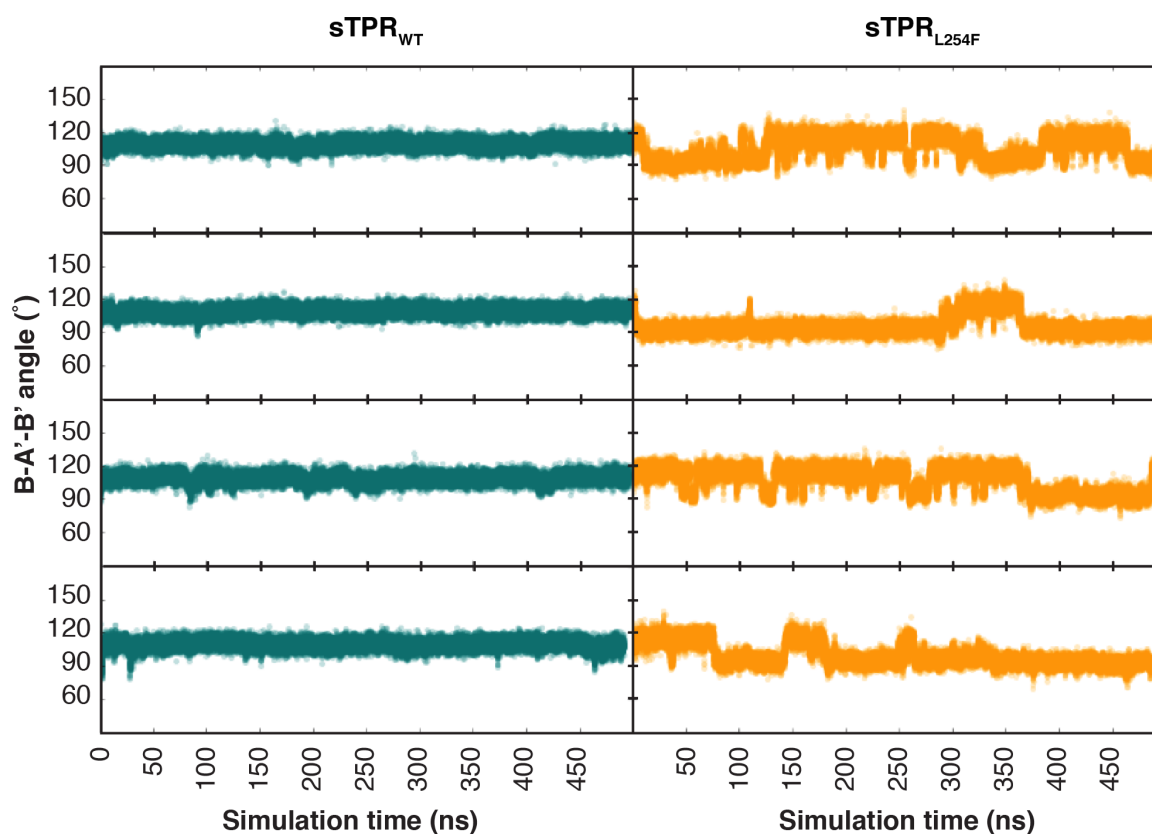

**Supplemental figure 3: Analysis of the angle B-A'-B'. Related to Figures 2B and 2C**

Molecular dynamics simulation data investigating the B-A'-B' angle observed in sTPR<sub>WT</sub> and sTPR<sub>L254F</sub> are shown on left and right panels, respectively. sTPR: simplified TPR; TPR: tetratricopeptide repeat.
